# Supplementary material
Source: publisher figshare collection journal article supplement (https://acs.figshare.com/ndownloader/files/5162545)
Supplement: Supplementary file 1 [file 5162545]

data_General 
_audit_creation_date                  'Tue Mar  2 17:59:36 2004'
_audit_creation_method                'by teXsan'
_audit_update_record                   ?
#------------------------------------------------------------------------------
# PROCESSING SUMMARY (IUCr Office Use Only) 
_journal_date_recd_electronic          ?
_journal_date_from_coeditor            ?
_journal_date_accepted                 ?
_journal_coeditor_code                 ?
#------------------------------------------------------------------------------
# SUBMISSION DETAILS 
_publ_contact_author_name             ' Masanobu Hidai'
_publ_contact_author_address
;
    ENTER ADDRESS
;
_publ_contact_author_email            ' ENTER EMAIL ADDRESS '
_publ_contact_author_fax              ' ENTER FAX NUMBER '
_publ_contact_author_phone            ' ENTER PHONE NUMBER '
_publ_contact_letter
;
    ENTER TEXT OF LETTER
;
_publ_requested_journal               ' J. Am. Chem. Soc.'
_publ_requested_category              ' CHOOSE FI FM FO CI CM CO or AD'

_publ_requested_coeditor_name          ?
#------------------------------------------------------------------------------
# TITLE AND AUTHOR LIST 

_publ_section_title
;
    ENTER SECTION TITLE
;

_publ_section_title_footnote
;
    ENTER FOOTNOTE TO TITLE OF PAPER
;
loop_
_publ_author_name
_publ_author_footnote
_publ_author_address
' FIRST AUTHORS NAME '
;
  FIRST AUTHORS FOOTNOTES
;
;
  FIRST AUTHORS ADDRESS
;
_publ_section_synopsis
;
  ENTER SYNOPSIS
;
#------------------------------------------------------------------------------
# TEXT 

_publ_section_abstract
;
    ENTER ABSTRACT
;

_publ_section_comment
;
    ENTER TEXT
;

_publ_section_acknowledgements
;
    ENTER ACKNOWLEDGEMENTS
;

_publ_section_references
;
    ENTER OTHER REFERENCES
Molecular Structure Corporation, Rigaku Corporation. (2000). teXsan. 
Single Crystal Structure Analysis Software. Version 1.11.
MSC, 3200 Research Forest Drive, The Woodlands, TX 77381, USA.
Rigaku, 3-9-12 Akishima, Tokyo, Japan.
;

_publ_section_figure_captions
;
    ENTER FIGURE CAPTIONS
;

_publ_section_exptl_prep
;
    ENTER COMPOUND PREPARATION DETAILS
;

_publ_section_exptl_refinement
;
    ENTER SPECIAL DETAILS OF THE REFINEMENT
;
#------------------------------------------------------------------------------
data_ns45b/yk39a
#------------------------------------------------------------------------------
# CHEMICAL DATA 
_chemical_formula_sum                  'C33 H72 N2 P4 Ti W '
_chemical_formula_moiety               '?'
_chemical_formula_weight               852.59
_chemical_melting_point                ?
#------------------------------------------------------------------------------
# CRYSTAL DATA 
_symmetry_cell_setting                 triclinic
_symmetry_space_group_name_H-M        'P -1         '
_symmetry_Int_Tables_number            2
loop_
_symmetry_equiv_pos_as_xyz
x,y,z
-x,-y,-z
_cell_length_a                         16.5426(7)
_cell_length_b                         17.8446(9)
_cell_length_c                         14.4551(8)
_cell_angle_alpha                      93.979(2)
_cell_angle_beta                       105.131(3)
_cell_angle_gamma                      74.260(2)
_cell_volume                           3964.7(3)
_cell_formula_units_Z                  4
_cell_measurement_reflns_used          80668
_cell_measurement_theta_min            1.2
_cell_measurement_theta_max            30.0
_cell_measurement_temperature          93.2
#------------------------------------------------------------------------------
_exptl_crystal_description            'cubic'
_exptl_crystal_colour                 'black'
_exptl_crystal_size_max                0.500
_exptl_crystal_size_mid                0.300
_exptl_crystal_size_min                0.200
_exptl_crystal_size_rad                ?
_exptl_crystal_density_diffrn          1.428
_exptl_crystal_density_meas            ?
_exptl_crystal_density_method         'not measured'
_exptl_absorpt_coefficient_mu          3.289
_exptl_absorpt_correction_type         multi-scan
_exptl_absorpt_process_details        '(Higashi, 1995)'
_exptl_absorpt_correction_T_min        0.262
_exptl_absorpt_correction_T_max        0.518
#------------------------------------------------------------------------------
# EXPERIMENTAL DATA 
_diffrn_radiation_type                'Mo K\a'
_diffrn_radiation_wavelength           0.7107
_diffrn_measurement_device_type       'Rigaku RAXIS-CS Imaging Plate'
_diffrn_measurement_method             \w
_diffrn_detector_area_resol_mean       10.00
_diffrn_reflns_number                  55363
_diffrn_reflns_av_R_equivalents        0.065
_diffrn_reflns_theta_max               30.03
_diffrn_measured_fraction_theta_max    0.9050
_diffrn_reflns_theta_full              30.03
_diffrn_measured_fraction_theta_full   0.9050
_diffrn_reflns_limit_h_min             0
_diffrn_reflns_limit_h_max             23
_diffrn_reflns_limit_k_min             -23
_diffrn_reflns_limit_k_max             25
_diffrn_reflns_limit_l_min             -20
_diffrn_reflns_limit_l_max             19
#------------------------------------------------------------------------------
# REFINEMENT DATA 
_refine_special_details
;
Refinement using reflections with F^2^ > -10.0 sigma(F^2^). The weighted 
R-factor (wR) and goodness of fit (S) are based on F^2^. R-factor (gt) are 
based on F. The threshold expression of F^2^ > 2.0 sigma(F^2^) is used only 
for calculating R-factor (gt).
;
_reflns_number_total                   21004
_reflns_number_gt                      16931
_reflns_threshold_expression           F^2^>2.0\s(F^2^)
_refine_ls_structure_factor_coef       Fsqd
_refine_ls_R_factor_gt                 0.0458
_refine_ls_wR_factor_ref               0.1268
_refine_ls_hydrogen_treatment          noref
_refine_ls_number_reflns               21004
_refine_ls_number_parameters           739
_refine_ls_goodness_of_fit_ref         1.433
_refine_ls_weighting_scheme            calc
_refine_ls_weighting_details
   'w = 1/[\s^2^(Fo^2^) + (0.05000(Max(Fo^2^,0) + 2Fc^2^)/3)^2^]'
_refine_ls_shift/su_max                0.0022
_refine_diff_density_max               1.14
_refine_diff_density_min               -2.70
_refine_ls_extinction_method           none
_refine_ls_extinction_coef             ?
_refine_ls_abs_structure_details       ?
_refine_ls_abs_structure_Flack         ?
loop_
_atom_type_symbol
_atom_type_description
_atom_type_scat_dispersion_real
_atom_type_scat_dispersion_imag
_atom_type_scat_source
  'C' 'C'  0.003 0.002 
;International Tables for Crystallography
(1992, Vol. C, Tables 4.2.6.8 and 6.1.1.1)
;
  'H' 'H'  0.000 0.000 
;International Tables for Crystallography
(1992, Vol. C, Table 6.1.1.2)
;
  'N' 'N'  0.006 0.003 
;International Tables for Crystallography
(1992, Vol. C, Tables 4.2.6.8 and 6.1.1.1)
;
  'P' 'P'  0.102 0.094 
;International Tables for Crystallography
(1992, Vol. C, Tables 4.2.6.8 and 6.1.1.1)
;
  'Ti' 'Ti'  0.278 0.446 
;International Tables for Crystallography
(1992, Vol. C, Tables 4.2.6.8 and 6.1.1.1)
;
  'W' 'W'  -0.849 6.872 
;International Tables for Crystallography
(1992, Vol. C, Tables 4.2.6.8 and 6.1.1.1)
;
#------------------------------------------------------------------------------
# ATOMIC COORDINATES AND DISPLACEMENT PARAMETERS 
loop_
_atom_site_label
_atom_site_type_symbol
_atom_site_fract_x
_atom_site_fract_y
_atom_site_fract_z
_atom_site_U_iso_or_equiv
_atom_site_adp_type
_atom_site_occupancy
_atom_site_calc_flag
_atom_site_refinement_flags
_atom_site_disorder_assembly
_atom_site_disorder_group
 W1     W  0.68378(1)  0.40616(1)  0.21942(1)  0.01467(5)  Uani 1.00 d . . .
 W2     W  0.30056(1)  0.07302(1)  0.27743(1)  0.01447(5)  Uani 1.00 d . . .
 Ti1    Ti 0.81872(6)  0.41467(5)  0.56415(6)  0.0180(2)   Uani 1.00 d . . .
 Ti2    Ti 0.20386(6)  0.10021(5)  -0.07157(6) 0.0171(2)   Uani 1.00 d . . .
 P1     P  0.81465(8)  0.41032(7)  0.17077(10) 0.0191(3)   Uani 1.00 d . . .
 P2     P  0.74550(8)  0.26681(7)  0.19916(9)  0.0173(3)   Uani 1.00 d . . .
 P3     P  0.54114(8)  0.40537(7)  0.24377(9)  0.0180(3)   Uani 1.00 d . . .
 P4     P  0.61544(8)  0.54689(7)  0.22493(9)  0.0171(3)   Uani 1.00 d . . .
 P5     P  0.35302(8)  -0.06669(7) 0.24448(9)  0.0167(3)   Uani 1.00 d . . .
 P6     P  0.44911(8)  0.06651(7)  0.27008(9)  0.0175(3)   Uani 1.00 d . . .
 P7     P  0.25481(8)  0.21023(7)  0.32325(10) 0.0201(3)   Uani 1.00 d . . .
 P8     P  0.16206(8)  0.07649(8)  0.31636(9)  0.0188(3)   Uani 1.00 d . . .
 N1     N  0.7345(3)   0.4045(2)   0.3489(3)   0.0179(9)   Uani 1.00 d . . .
 N2     N  0.7683(3)   0.4074(2)   0.4359(3)   0.0174(9)   Uani 1.00 d . . .
 N3     N  0.2585(2)   0.0919(2)   0.1484(3)   0.0159(9)   Uani 1.00 d . . .
 N4     N  0.2362(2)   0.0998(2)   0.0599(3)   0.0164(9)   Uani 1.00 d . . .
 C1     C  0.7086(4)   0.4843(3)   0.6097(4)   0.030(1)    Uani 1.00 d . . .
 C2     C  0.8841(4)   0.5037(3)   0.5627(4)   0.028(1)    Uani 1.00 d . . .
 C3     C  0.6202(3)   0.4097(2)   0.0512(3)   0.0111(9)   Uani 1.00 d . . .
 C4     C  0.9182(3)   0.3702(3)   0.7198(4)   0.022(1)    Uani 1.00 d . . .
 C5     C  0.9612(3)   0.3374(3)   0.6487(4)   0.023(1)    Uani 1.00 d . . .
 C6     C  0.9148(3)   0.2868(3)   0.5915(4)   0.021(1)    Uani 1.00 d . . .
 C7     C  0.8418(3)   0.2904(3)   0.6288(4)   0.020(1)    Uani 1.00 d . . .
 C8     C  0.8452(3)   0.3408(3)   0.7088(4)   0.024(1)    Uani 1.00 d . . .
 C9     C  0.9483(4)   0.4254(3)   0.7964(4)   0.037(2)    Uani 1.00 d . . .
 C10    C  1.0456(4)   0.3473(4)   0.6388(5)   0.035(2)    Uani 1.00 d . . .
 C11    C  0.9423(4)   0.2350(3)   0.5135(4)   0.028(1)    Uani 1.00 d . . .
 C12    C  0.7797(4)   0.2400(3)   0.5963(4)   0.031(1)    Uani 1.00 d . . .
 C13    C  0.7862(4)   0.3536(3)   0.7745(4)   0.033(2)    Uani 1.00 d . . .
 C14    C  0.8653(3)   0.3124(3)   0.1278(4)   0.024(1)    Uani 1.00 d . . .
 C15    C  0.8582(3)   0.2487(3)   0.1886(4)   0.026(1)    Uani 1.00 d . . .
 C16    C  0.9078(3)   0.4342(3)   0.2576(4)   0.027(1)    Uani 1.00 d . . .
 C17    C  0.9477(4)   0.3810(3)   0.3454(4)   0.029(1)    Uani 1.00 d . . .
 C18    C  0.8025(4)   0.4751(3)   0.0709(4)   0.029(1)    Uani 1.00 d . . .
 C19    C  0.8788(4)   0.4647(4)   0.0267(4)   0.034(2)    Uani 1.00 d . . .
 C20    C  0.7013(3)   0.2116(3)   0.0942(4)   0.022(1)    Uani 1.00 d . . .
 C21    C  0.6149(4)   0.1973(3)   0.0939(4)   0.028(1)    Uani 1.00 d . . .
 C22    C  0.7561(3)   0.2066(3)   0.3023(4)   0.025(1)    Uani 1.00 d . . .
 C23    C  0.8105(4)   0.1227(3)   0.3054(4)   0.029(1)    Uani 1.00 d . . .
 C24    C  0.4959(4)   0.5005(3)   0.2941(4)   0.031(2)    Uani 1.00 d . . .
 C25    C  0.5021(3)   0.5647(3)   0.2336(4)   0.028(1)    Uani 1.00 d . . .
 C26    C  0.5285(3)   0.3364(3)   0.3246(4)   0.028(1)    Uani 1.00 d . . .
 C27    C  0.5832(4)   0.3367(4)   0.4265(4)   0.040(2)    Uani 1.00 d . . .
 C28    C  0.4533(3)   0.4004(3)   0.1367(4)   0.023(1)    Uani 1.00 d . . .
 C29    C  0.3619(4)   0.4135(4)   0.1487(4)   0.034(2)    Uani 1.00 d . . .
 C30    C  0.6598(4)   0.5983(3)   0.3324(4)   0.023(1)    Uani 1.00 d . . .
 C31    C  0.7535(4)   0.6001(3)   0.3446(4)   0.031(1)    Uani 1.00 d . . .
 C32    C  0.6048(4)   0.6124(3)   0.1277(4)   0.026(1)    Uani 1.00 d . . .
 C33    C  0.5456(4)   0.6947(3)   0.1266(4)   0.028(1)    Uani 1.00 d . . .
 C34    C  0.1374(3)   0.0095(3)   -0.0924(4)  0.022(1)    Uani 1.00 d . . .
 C35    C  0.3248(3)   0.0344(3)   -0.1009(4)  0.027(1)    Uani 1.00 d . . .
 C36    C  0.3635(3)   0.0434(2)   0.4417(3)   0.0121(10)  Uani 1.00 d . . .
 C37    C  0.1439(4)   0.1519(3)   -0.2356(4)  0.026(1)    Uani 1.00 d . . .
 C38    C  0.2034(3)   0.1935(3)   -0.1859(4)  0.024(1)    Uani 1.00 d . . .
 C39    C  0.1723(4)   0.2342(3)   -0.1103(4)  0.025(1)    Uani 1.00 d . . .
 C40    C  0.0928(3)   0.2181(3)   -0.1117(4)  0.024(1)    Uani 1.00 d . . .
 C41    C  0.0746(3)   0.1667(3)   -0.1891(4)  0.027(1)    Uani 1.00 d . . .
 C42    C  0.1515(5)   0.1022(4)   -0.3215(4)  0.046(2)    Uani 1.00 d . . .
 C43    C  0.2830(4)   0.1982(4)   -0.2150(6)  0.047(2)    Uani 1.00 d . . .
 C44    C  0.2106(4)   0.2922(3)   -0.0456(4)  0.037(2)    Uani 1.00 d . . .
 C45    C  0.0342(4)   0.2494(4)   -0.0458(5)  0.046(2)    Uani 1.00 d . . .
 C46    C  -0.0069(4)  0.1417(4)   -0.2207(5)  0.050(2)    Uani 1.00 d . . .
 C47    C  0.4602(3)   -0.0860(3)  0.2176(4)   0.022(1)    Uani 1.00 d . . .
 C48    C  0.5152(3)   -0.0353(3)  0.2797(4)   0.022(1)    Uani 1.00 d . . .
 C49    C  0.2971(4)   -0.1105(3)  0.1365(4)   0.025(1)    Uani 1.00 d . . .
 C50    C  0.2104(4)   -0.1221(3)  0.1380(4)   0.031(1)    Uani 1.00 d . . .
 C51    C  0.3741(3)   -0.1387(3)  0.3396(4)   0.023(1)    Uani 1.00 d . . .
 C52    C  0.4088(4)   -0.2240(3)  0.3164(4)   0.029(1)    Uani 1.00 d . . .
 C53    C  0.4583(3)   0.0942(3)   0.1545(4)   0.021(1)    Uani 1.00 d . . .
 C54    C  0.4166(4)   0.1804(3)   0.1296(4)   0.029(1)    Uani 1.00 d . . .
 C55    C  0.5204(3)   0.1149(3)   0.3586(4)   0.022(1)    Uani 1.00 d . . .
 C56    C  0.6161(3)   0.0940(3)   0.3567(4)   0.028(1)    Uani 1.00 d . . .
 C57    C  0.1768(4)   0.2218(3)   0.3974(4)   0.026(1)    Uani 1.00 d . . .
 C58    C  0.1100(3)   0.1768(3)   0.3521(4)   0.024(1)    Uani 1.00 d . . .
 C59    C  0.1928(4)   0.2689(3)   0.2157(4)   0.029(1)    Uani 1.00 d . . .
 C60    C  0.1470(4)   0.3543(3)   0.2277(5)   0.037(2)    Uani 1.00 d . . .
 C61    C  0.3243(4)   0.2721(3)   0.3876(5)   0.035(2)    Uani 1.00 d . . .
 C62    C  0.3773(4)   0.2446(4)   0.4882(5)   0.042(2)    Uani 1.00 d . . .
 C63    C  0.0685(3)   0.0566(3)   0.2269(4)   0.024(1)    Uani 1.00 d . . .
 C64    C  0.0507(3)   0.0937(4)   0.1299(4)   0.028(1)    Uani 1.00 d . . .
 C65    C  0.1669(3)   0.0174(3)   0.4196(4)   0.028(1)    Uani 1.00 d . . .
 C66    C  0.0821(3)   0.0158(3)   0.4398(4)   0.027(1)    Uani 1.00 d . . .
 H1a    H  0.7254      0.4938      0.6767      0.0356      Uiso 1.00 calc . . .
 H1b    H  0.6878      0.5327      0.5764      0.0356      Uiso 1.00 calc . . .
 H1c    H  0.6644      0.4579      0.5965      0.0356      Uiso 1.00 calc . . .
 H2a    H  0.9138      0.5131      0.6262      0.0343      Uiso 1.00 calc . . .
 H2b    H  0.9247      0.4868      0.5246      0.0343      Uiso 1.00 calc . . .
 H2c    H  0.8428      0.5502      0.5364      0.0343      Uiso 1.00 calc . . .
 H3a    H  0.6226      0.4559      0.0253      0.0137      Uiso 1.00 calc . . .
 H3b    H  0.6514      0.3657      0.0222      0.0137      Uiso 1.00 calc . . .
 H3c    H  0.5615      0.4079      0.0399      0.0137      Uiso 1.00 calc . . .
 H9a    H  1.0049      0.4007      0.8338      0.0439      Uiso 1.00 calc . . .
 H9b    H  0.9501      0.4708      0.7672      0.0439      Uiso 1.00 calc . . .
 H9c    H  0.9094      0.4392      0.8364      0.0439      Uiso 1.00 calc . . .
 H10a   H  1.0884      0.2989      0.6500      0.0416      Uiso 1.00 calc . . .
 H10b   H  1.0385      0.3651      0.5761      0.0416      Uiso 1.00 calc . . .
 H10c   H  1.0637      0.3844      0.6844      0.0416      Uiso 1.00 calc . . .
 H11a   H  0.9477      0.2656      0.4653      0.0340      Uiso 1.00 calc . . .
 H11b   H  0.9967      0.1992      0.5393      0.0340      Uiso 1.00 calc . . .
 H11c   H  0.9002      0.2073      0.4865      0.0340      Uiso 1.00 calc . . .
 H12a   H  0.7907      0.2118      0.5407      0.0378      Uiso 1.00 calc . . .
 H12b   H  0.7875      0.2045      0.6459      0.0378      Uiso 1.00 calc . . .
 H12c   H  0.7217      0.2719      0.5818      0.0378      Uiso 1.00 calc . . .
 H13a   H  0.8014      0.3901      0.8230      0.0398      Uiso 1.00 calc . . .
 H13b   H  0.7279      0.3735      0.7393      0.0398      Uiso 1.00 calc . . .
 H13c   H  0.7922      0.3058      0.8040      0.0398      Uiso 1.00 calc . . .
 H14a   H  0.8366      0.3062      0.0628      0.0293      Uiso 1.00 calc . . .
 H14b   H  0.9250      0.3079      0.1327      0.0293      Uiso 1.00 calc . . .
 H15a   H  0.8961      0.2483      0.2505      0.0307      Uiso 1.00 calc . . .
 H15b   H  0.8743      0.1995      0.1588      0.0307      Uiso 1.00 calc . . .
 H16a   H  0.9518      0.4315      0.2255      0.0322      Uiso 1.00 calc . . .
 H16b   H  0.8889      0.4859      0.2795      0.0322      Uiso 1.00 calc . . .
 H17a   H  0.9051      0.3835      0.3795      0.0342      Uiso 1.00 calc . . .
 H17b   H  0.9679      0.3290      0.3254      0.0342      Uiso 1.00 calc . . .
 H17c   H  0.9949      0.3976      0.3860      0.0342      Uiso 1.00 calc . . .
 H18a   H  0.7549      0.4682      0.0213      0.0344      Uiso 1.00 calc . . .
 H18b   H  0.7900      0.5270      0.0941      0.0344      Uiso 1.00 calc . . .
 H19a   H  0.8930      0.4132      0.0019      0.0413      Uiso 1.00 calc . . .
 H19b   H  0.8639      0.5011      -0.0237     0.0413      Uiso 1.00 calc . . .
 H19c   H  0.9277      0.4725      0.0743      0.0413      Uiso 1.00 calc . . .
 H20a   H  0.6937      0.2400      0.0379      0.0265      Uiso 1.00 calc . . .
 H20b   H  0.7420      0.1626      0.0932      0.0265      Uiso 1.00 calc . . .
 H21a   H  0.5731      0.2457      0.0941      0.0329      Uiso 1.00 calc . . .
 H21b   H  0.5960      0.1689      0.0379      0.0329      Uiso 1.00 calc . . .
 H21c   H  0.6214      0.1681      0.1491      0.0329      Uiso 1.00 calc . . .
 H22a   H  0.7808      0.2316      0.3585      0.0294      Uiso 1.00 calc . . .
 H22b   H  0.6991      0.2054      0.3033      0.0294      Uiso 1.00 calc . . .
 H23a   H  0.8112      0.0982      0.3620      0.0346      Uiso 1.00 calc . . .
 H23b   H  0.7864      0.0956      0.2509      0.0346      Uiso 1.00 calc . . .
 H23c   H  0.8682      0.1218      0.3053      0.0346      Uiso 1.00 calc . . .
 H24a   H  0.4370      0.5059      0.2928      0.0371      Uiso 1.00 calc . . .
 H24b   H  0.5282      0.5041      0.3583      0.0371      Uiso 1.00 calc . . .
 H25a   H  0.4853      0.6137      0.2632      0.0328      Uiso 1.00 calc . . .
 H25b   H  0.4649      0.5646      0.1715      0.0328      Uiso 1.00 calc . . .
 H26a   H  0.4692      0.3494      0.3262      0.0334      Uiso 1.00 calc . . .
 H26b   H  0.5440      0.2855      0.2994      0.0334      Uiso 1.00 calc . . .
 H27a   H  0.5731      0.2997      0.4634      0.0476      Uiso 1.00 calc . . .
 H27b   H  0.6427      0.3233      0.4264      0.0476      Uiso 1.00 calc . . .
 H27c   H  0.5677      0.3870      0.4533      0.0476      Uiso 1.00 calc . . .
 H28a   H  0.4511      0.4386      0.0929      0.0282      Uiso 1.00 calc . . .
 H28b   H  0.4684      0.3501      0.1098      0.0282      Uiso 1.00 calc . . .
 H29a   H  0.3437      0.4641      0.1744      0.0410      Uiso 1.00 calc . . .
 H29b   H  0.3232      0.4096      0.0881      0.0410      Uiso 1.00 calc . . .
 H29c   H  0.3610      0.3756      0.1910      0.0410      Uiso 1.00 calc . . .
 H30a   H  0.6250      0.6505      0.3291      0.0272      Uiso 1.00 calc . . .
 H30b   H  0.6570      0.5733      0.3869      0.0272      Uiso 1.00 calc . . .
 H31a   H  0.7896      0.5484      0.3488      0.0373      Uiso 1.00 calc . . .
 H31b   H  0.7577      0.6257      0.2912      0.0373      Uiso 1.00 calc . . .
 H31c   H  0.7717      0.6275      0.4016      0.0373      Uiso 1.00 calc . . .
 H32a   H  0.6613      0.6174      0.1309      0.0316      Uiso 1.00 calc . . .
 H32b   H  0.5837      0.5885      0.0692      0.0316      Uiso 1.00 calc . . .
 H33a   H  0.5656      0.7209      0.1840      0.0334      Uiso 1.00 calc . . .
 H33b   H  0.5463      0.7225      0.0731      0.0334      Uiso 1.00 calc . . .
 H33c   H  0.4881      0.6921      0.1219      0.0334      Uiso 1.00 calc . . .
 H34a   H  0.0836      0.0286      -0.0759     0.0267      Uiso 1.00 calc . . .
 H34b   H  0.1273      -0.0061     -0.1577     0.0267      Uiso 1.00 calc . . .
 H34c   H  0.1722      -0.0337     -0.0529     0.0267      Uiso 1.00 calc . . .
 H35a   H  0.3412      -0.0160     -0.0732     0.0327      Uiso 1.00 calc . . .
 H35b   H  0.3179      0.0298      -0.1681     0.0327      Uiso 1.00 calc . . .
 H35c   H  0.3686      0.0604      -0.0738     0.0327      Uiso 1.00 calc . . .
 H36a   H  0.3199      0.0411      0.4726      0.0144      Uiso 1.00 calc . . .
 H36b   H  0.4058      -0.0057     0.4487      0.0144      Uiso 1.00 calc . . .
 H36c   H  0.3909      0.0825      0.4718      0.0144      Uiso 1.00 calc . . .
 H42a   H  0.1042      0.0795      -0.3403     0.0557      Uiso 1.00 calc . . .
 H42b   H  0.1519      0.1329      -0.3724     0.0557      Uiso 1.00 calc . . .
 H42c   H  0.2045      0.0620      -0.3065     0.0557      Uiso 1.00 calc . . .
 H43a   H  0.3326      0.1821      -0.1629     0.0564      Uiso 1.00 calc . . .
 H43b   H  0.2894      0.1652      -0.2683     0.0564      Uiso 1.00 calc . . .
 H43c   H  0.2767      0.2504      -0.2317     0.0564      Uiso 1.00 calc . . .
 H44a   H  0.2205      0.2778      0.0192      0.0444      Uiso 1.00 calc . . .
 H44b   H  0.2640      0.2927      -0.0583     0.0444      Uiso 1.00 calc . . .
 H44c   H  0.1714      0.3425      -0.0571     0.0444      Uiso 1.00 calc . . .
 H45a   H  0.0594      0.2828      0.0007      0.0548      Uiso 1.00 calc . . .
 H45b   H  -0.0207     0.2784      -0.0819     0.0548      Uiso 1.00 calc . . .
 H45c   H  0.0276      0.2077      -0.0141     0.0548      Uiso 1.00 calc . . .
 H46a   H  -0.0548     0.1859      -0.2387     0.0599      Uiso 1.00 calc . . .
 H46b   H  -0.0040     0.1075      -0.2738     0.0599      Uiso 1.00 calc . . .
 H46c   H  -0.0139     0.1152      -0.1696     0.0599      Uiso 1.00 calc . . .
 H47a   H  0.4901      -0.1393     0.2302      0.0269      Uiso 1.00 calc . . .
 H47b   H  0.4522      -0.0749     0.1522      0.0269      Uiso 1.00 calc . . .
 H48a   H  0.5656      -0.0394     0.2579      0.0260      Uiso 1.00 calc . . .
 H48b   H  0.5320      -0.0518     0.3448      0.0260      Uiso 1.00 calc . . .
 H49a   H  0.2883      -0.0779     0.0838      0.0296      Uiso 1.00 calc . . .
 H49b   H  0.3341      -0.1601     0.1278      0.0296      Uiso 1.00 calc . . .
 H50a   H  0.1720      -0.0731     0.1461      0.0378      Uiso 1.00 calc . . .
 H50b   H  0.1868      -0.1448     0.0794      0.0378      Uiso 1.00 calc . . .
 H50c   H  0.2178      -0.1555     0.1898      0.0378      Uiso 1.00 calc . . .
 H51a   H  0.4152      -0.1258     0.3934      0.0273      Uiso 1.00 calc . . .
 H51b   H  0.3210      -0.1335     0.3563      0.0273      Uiso 1.00 calc . . .
 H52a   H  0.4166      -0.2551     0.3705      0.0345      Uiso 1.00 calc . . .
 H52b   H  0.3687      -0.2389     0.2634      0.0345      Uiso 1.00 calc . . .
 H52c   H  0.4630      -0.2314     0.3013      0.0345      Uiso 1.00 calc . . .
 H53a   H  0.5181      0.0831      0.1561      0.0256      Uiso 1.00 calc . . .
 H53b   H  0.4309      0.0640      0.1060      0.0256      Uiso 1.00 calc . . .
 H54a   H  0.4437      0.2116      0.1768      0.0347      Uiso 1.00 calc . . .
 H54b   H  0.4233      0.1906      0.0687      0.0347      Uiso 1.00 calc . . .
 H54c   H  0.3564      0.1925      0.1272      0.0347      Uiso 1.00 calc . . .
 H55a   H  0.4978      0.1694      0.3486      0.0263      Uiso 1.00 calc . . .
 H55b   H  0.5182      0.1021      0.4205      0.0263      Uiso 1.00 calc . . .
 H56a   H  0.6405      0.0397      0.3677      0.0336      Uiso 1.00 calc . . .
 H56b   H  0.6201      0.1068      0.2956      0.0336      Uiso 1.00 calc . . .
 H56c   H  0.6462      0.1222      0.4050      0.0336      Uiso 1.00 calc . . .
 H57a   H  0.2069      0.2023      0.4599      0.0313      Uiso 1.00 calc . . .
 H57b   H  0.1481      0.2754      0.4010      0.0313      Uiso 1.00 calc . . .
 H58a   H  0.0715      0.2040      0.2969      0.0293      Uiso 1.00 calc . . .
 H58b   H  0.0785      0.1732      0.3972      0.0293      Uiso 1.00 calc . . .
 H59a   H  0.2321      0.2676      0.1774      0.0351      Uiso 1.00 calc . . .
 H59b   H  0.1495      0.2441      0.1820      0.0351      Uiso 1.00 calc . . .
 H60a   H  0.1886      0.3812      0.2595      0.0446      Uiso 1.00 calc . . .
 H60b   H  0.1180      0.3770      0.1660      0.0446      Uiso 1.00 calc . . .
 H60c   H  0.1059      0.3577      0.2637      0.0446      Uiso 1.00 calc . . .
 H61a   H  0.3636      0.2744      0.3509      0.0423      Uiso 1.00 calc . . .
 H61b   H  0.2882      0.3228      0.3927      0.0423      Uiso 1.00 calc . . .
 H62a   H  0.3392      0.2428      0.5267      0.0497      Uiso 1.00 calc . . .
 H62b   H  0.4144      0.1939      0.4848      0.0497      Uiso 1.00 calc . . .
 H62c   H  0.4112      0.2795      0.5157      0.0497      Uiso 1.00 calc . . .
 H63a   H  0.0793      0.0019      0.2185      0.0289      Uiso 1.00 calc . . .
 H63b   H  0.0187      0.0757      0.2510      0.0289      Uiso 1.00 calc . . .
 H64a   H  0.0387      0.1487      0.1367      0.0335      Uiso 1.00 calc . . .
 H64b   H  0.1000      0.0752      0.1045      0.0335      Uiso 1.00 calc . . .
 H64c   H  0.0020      0.0806      0.0876      0.0335      Uiso 1.00 calc . . .
 H65a   H  0.1967      -0.0347     0.4088      0.0328      Uiso 1.00 calc . . .
 H65b   H  0.1999      0.0370      0.4753      0.0328      Uiso 1.00 calc . . .
 H66a   H  0.0514      0.0669      0.4523      0.0328      Uiso 1.00 calc . . .
 H66b   H  0.0481      -0.0048     0.3857      0.0328      Uiso 1.00 calc . . .
 H66c   H  0.0938      -0.0164     0.4940      0.0328      Uiso 1.00 calc . . .

loop_
_atom_site_aniso_label
_atom_site_aniso_U_11
_atom_site_aniso_U_22
_atom_site_aniso_U_33
_atom_site_aniso_U_12
_atom_site_aniso_U_13
_atom_site_aniso_U_23
 W1     0.01506(9)  0.01350(9)  0.01560(10) -0.00305(7) 0.00477(7)  -0.00067(7)
 W2     0.01380(9)  0.01421(9)  0.01543(10) -0.00264(7) 0.00501(7)  -0.00168(7)
 Ti1    0.0186(4)   0.0190(4)   0.0166(4)   -0.0047(3)  0.0050(3)   0.0000(3)  
 Ti2    0.0174(4)   0.0164(4)   0.0172(4)   -0.0034(3)  0.0048(3)   -0.0002(3) 
 P1     0.0182(6)   0.0174(6)   0.0242(7)   -0.0049(5)  0.0091(5)   0.0007(5)  
 P2     0.0185(6)   0.0147(5)   0.0193(6)   -0.0042(5)  0.0061(5)   -0.0022(4) 
 P3     0.0180(6)   0.0198(6)   0.0182(6)   -0.0063(5)  0.0065(5)   -0.0004(5) 
 P4     0.0180(5)   0.0154(5)   0.0173(6)   -0.0027(5)  0.0054(5)   -0.0025(4) 
 P5     0.0176(5)   0.0152(5)   0.0183(6)   -0.0029(5)  0.0077(5)   -0.0010(4) 
 P6     0.0153(5)   0.0173(6)   0.0200(6)   -0.0040(5)  0.0051(5)   -0.0005(5) 
 P7     0.0196(6)   0.0166(6)   0.0236(7)   -0.0036(5)  0.0068(5)   -0.0058(5) 
 P8     0.0174(6)   0.0206(6)   0.0201(6)   -0.0042(5)  0.0085(5)   -0.0016(5) 
 N1     0.016(2)    0.017(2)    0.019(2)    -0.003(2)   0.003(2)    0.001(2)   
 N2     0.016(2)    0.019(2)    0.019(2)    -0.004(2)   0.006(2)    0.000(2)   
 N3     0.013(2)    0.014(2)    0.020(2)    -0.003(2)   0.004(1)    -0.001(1)  
 N4     0.015(2)    0.017(2)    0.018(2)    -0.004(2)   0.007(2)    -0.001(1)  
 C1     0.029(3)    0.032(3)    0.026(3)    -0.002(2)   0.010(2)    -0.001(2)  
 C2     0.035(3)    0.027(3)    0.024(3)    -0.013(2)   0.003(2)    0.001(2)   
 C3     0.013(2)    0.008(2)    0.016(2)    -0.006(2)   0.007(2)    -0.003(1)  
 C4     0.027(3)    0.021(2)    0.017(2)    -0.006(2)   0.005(2)    0.000(2)   
 C5     0.021(2)    0.026(3)    0.022(3)    -0.006(2)   0.006(2)    0.001(2)   
 C6     0.025(2)    0.022(2)    0.018(2)    -0.005(2)   0.010(2)    0.003(2)   
 C7     0.020(2)    0.020(2)    0.023(2)    -0.007(2)   0.005(2)    0.005(2)   
 C8     0.028(3)    0.025(2)    0.021(3)    -0.008(2)   0.009(2)    0.001(2)   
 C9     0.056(4)    0.031(3)    0.020(3)    -0.016(3)   -0.003(3)   0.001(2)   
 C10    0.023(3)    0.035(3)    0.045(4)    -0.004(2)   0.008(3)    0.006(3)   
 C11    0.029(3)    0.025(3)    0.028(3)    -0.001(2)   0.009(2)    -0.005(2)  
 C12    0.029(3)    0.028(3)    0.032(3)    -0.012(2)   -0.004(2)   0.005(2)   
 C13    0.041(3)    0.033(3)    0.030(3)    -0.009(3)   0.017(3)    0.003(2)   
 C14    0.025(3)    0.020(2)    0.032(3)    -0.005(2)   0.015(2)    -0.003(2)  
 C15    0.023(2)    0.019(2)    0.035(3)    -0.002(2)   0.011(2)    -0.001(2)  
 C16    0.018(2)    0.022(2)    0.042(3)    -0.008(2)   0.008(2)    -0.001(2)  
 C17    0.025(3)    0.034(3)    0.028(3)    -0.009(2)   0.008(2)    -0.005(2)  
 C18    0.034(3)    0.021(2)    0.035(3)    -0.003(2)   0.017(2)    0.007(2)   
 C19    0.040(3)    0.033(3)    0.034(3)    -0.005(3)   0.022(3)    0.003(2)   
 C20    0.025(2)    0.020(2)    0.023(3)    -0.005(2)   0.009(2)    -0.004(2)  
 C21    0.029(3)    0.025(3)    0.028(3)    -0.008(2)   0.005(2)    -0.005(2)  
 C22    0.026(3)    0.025(3)    0.020(2)    -0.004(2)   0.004(2)    0.003(2)   
 C23    0.033(3)    0.021(2)    0.034(3)    -0.004(2)   0.012(2)    0.006(2)   
 C24    0.033(3)    0.030(3)    0.037(3)    -0.012(3)   0.021(3)    -0.011(2)  
 C25    0.023(2)    0.018(2)    0.042(3)    -0.002(2)   0.013(2)    -0.007(2)  
 C26    0.023(2)    0.037(3)    0.026(3)    -0.011(2)   0.004(2)    0.008(2)   
 C27    0.035(3)    0.066(4)    0.024(3)    -0.026(3)   0.000(2)    0.017(3)   
 C28    0.021(2)    0.021(2)    0.022(3)    -0.001(2)   0.002(2)    -0.001(2)  
 C29    0.018(2)    0.050(4)    0.032(3)    -0.009(3)   0.001(2)    -0.001(3)  
 C30    0.031(3)    0.019(2)    0.018(2)    -0.008(2)   0.006(2)    -0.003(2)  
 C31    0.030(3)    0.027(3)    0.034(3)    -0.009(2)   0.001(2)    -0.001(2)  
 C32    0.033(3)    0.020(2)    0.023(3)    0.000(2)    0.008(2)    0.000(2)   
 C33    0.031(3)    0.020(2)    0.034(3)    -0.007(2)   0.008(2)    0.004(2)   
 C34    0.025(2)    0.020(2)    0.023(3)    -0.010(2)   0.006(2)    -0.003(2)  
 C35    0.025(3)    0.034(3)    0.019(3)    -0.002(2)   0.006(2)    -0.001(2)  
 C36    0.009(2)    0.013(2)    0.017(2)    -0.003(2)   0.007(2)    -0.001(2)  
 C37    0.039(3)    0.020(2)    0.014(2)    -0.002(2)   0.003(2)    0.004(2)   
 C38    0.024(2)    0.022(2)    0.030(3)    -0.007(2)   0.008(2)    0.011(2)   
 C39    0.027(3)    0.019(2)    0.024(3)    -0.003(2)   0.001(2)    0.002(2)   
 C40    0.021(2)    0.024(2)    0.026(3)    0.003(2)    0.008(2)    0.008(2)   
 C41    0.025(3)    0.023(2)    0.029(3)    -0.008(2)   -0.005(2)   0.009(2)   
 C42    0.076(5)    0.029(3)    0.021(3)    0.002(3)    0.009(3)    0.000(2)   
 C43    0.039(4)    0.039(4)    0.068(5)    0.001(3)    0.024(3)    0.027(3)   
 C44    0.048(4)    0.022(3)    0.036(3)    -0.016(3)   -0.004(3)   0.001(2)   
 C45    0.044(4)    0.039(3)    0.049(4)    0.013(3)    0.024(3)    0.016(3)   
 C46    0.034(3)    0.047(4)    0.058(5)    -0.015(3)   -0.020(3)   0.024(3)   
 C47    0.025(2)    0.015(2)    0.033(3)    -0.005(2)   0.019(2)    -0.003(2)  
 C48    0.016(2)    0.020(2)    0.032(3)    -0.006(2)   0.009(2)    0.005(2)   
 C49    0.030(3)    0.025(2)    0.021(3)    -0.008(2)   0.010(2)    -0.004(2)  
 C50    0.031(3)    0.030(3)    0.033(3)    -0.011(2)   0.004(2)    -0.005(2)  
 C51    0.029(3)    0.016(2)    0.022(3)    -0.001(2)   0.009(2)    0.001(2)   
 C52    0.034(3)    0.018(2)    0.038(3)    -0.005(2)   0.017(3)    0.001(2)   
 C53    0.020(2)    0.026(2)    0.019(2)    -0.008(2)   0.005(2)    0.000(2)   
 C54    0.025(3)    0.033(3)    0.032(3)    -0.010(2)   0.006(2)    0.009(2)   
 C55    0.023(2)    0.023(2)    0.019(2)    -0.007(2)   0.003(2)    -0.003(2)  
 C56    0.023(3)    0.037(3)    0.029(3)    -0.015(2)   0.005(2)    0.007(2)   
 C57    0.028(3)    0.026(3)    0.023(3)    -0.002(2)   0.008(2)    -0.007(2)  
 C58    0.021(2)    0.028(3)    0.028(3)    -0.006(2)   0.015(2)    -0.004(2)  
 C59    0.034(3)    0.019(2)    0.035(3)    -0.001(2)   0.012(2)    -0.002(2)  
 C60    0.040(3)    0.020(3)    0.046(4)    0.002(3)    0.012(3)    0.001(2)   
 C61    0.028(3)    0.027(3)    0.052(4)    -0.011(2)   0.014(3)    -0.018(3)  
 C62    0.030(3)    0.051(4)    0.045(4)    -0.016(3)   0.012(3)    -0.025(3)  
 C63    0.022(2)    0.028(3)    0.024(3)    -0.010(2)   0.007(2)    0.000(2)   
 C64    0.020(2)    0.046(3)    0.024(3)    -0.015(2)   0.006(2)    0.004(2)   
 C65    0.024(2)    0.032(3)    0.028(3)    -0.003(2)   0.013(2)    -0.001(2)  
 C66    0.023(2)    0.040(3)    0.024(3)    -0.009(2)   0.013(2)    0.002(2)   
#------------------------------------------------------------------------------
_computing_data_collection            'PROCESS-AUTO'
_computing_cell_refinement            'PROCESS-AUTO'
_computing_data_reduction             'teXsan Ver. 1.11'
_computing_structure_solution          SIR97
_computing_structure_refinement       'teXsan Ver. 1.10'
_computing_publication_material       'teXsan Ver. 1.11'
_computing_molecular_graphics          ?
#------------------------------------------------------------------------------
_geom_special_details
;
 ?
;
loop_
_geom_bond_atom_site_label_1
_geom_bond_atom_site_label_2
_geom_bond_distance
_geom_bond_site_symmetry_1
_geom_bond_site_symmetry_2
_geom_bond_publ_flag
 W1        P1        2.465(1)   . . yes
 W1        P2        2.447(1)   . . yes
 W1        P3        2.479(1)   . . yes
 W1        P4        2.464(1)   . . yes
 W1        N1        1.839(4)   . . yes
 W1        C3        2.381(4)   . . yes
 W2        P5        2.464(1)   . . yes
 W2        P6        2.458(1)   . . yes
 W2        P7        2.457(1)   . . yes
 W2        P8        2.482(1)   . . yes
 W2        N3        1.832(4)   . . yes
 W2        C36       2.364(4)   . . yes
 TI1       N2        1.836(4)   . . yes
 TI1       C1        2.140(6)   . . yes
 TI1       C2        2.155(5)   . . yes
 TI1       C4        2.451(5)   . . yes
 TI1       C5        2.432(5)   . . yes
 TI1       C6        2.391(5)   . . yes
 TI1       C7        2.362(5)   . . yes
 TI1       C8        2.428(5)   . . yes
 TI2       N4        1.835(4)   . . yes
 TI2       C34       2.154(5)   . . yes
 TI2       C35       2.158(6)   . . yes
 TI2       C37       2.457(5)   . . yes
 TI2       C38       2.423(5)   . . yes
 TI2       C39       2.379(5)   . . yes
 TI2       C40       2.378(5)   . . yes
 TI2       C41       2.424(5)   . . yes
 P1        C14       1.862(5)   . . yes
 P1        C16       1.845(5)   . . yes
 P1        C18       1.848(5)   . . yes
 P2        C15       1.849(6)   . . yes
 P2        C20       1.847(5)   . . yes
 P2        C22       1.841(5)   . . yes
 P3        C24       1.842(6)   . . yes
 P3        C26       1.841(5)   . . yes
 P3        C28       1.841(5)   . . yes
 P4        C25       1.850(6)   . . yes
 P4        C30       1.834(5)   . . yes
 P4        C32       1.833(5)   . . yes
 P5        C47       1.850(5)   . . yes
 P5        C49       1.836(5)   . . yes
 P5        C51       1.848(5)   . . yes
 P6        C48       1.842(5)   . . yes
 P6        C53       1.829(5)   . . yes
 P6        C55       1.839(5)   . . yes
 P7        C57       1.844(6)   . . yes
 P7        C59       1.837(6)   . . yes
 P7        C61       1.842(6)   . . yes
 P8        C58       1.865(6)   . . yes
 P8        C63       1.839(5)   . . yes
 P8        C65       1.858(6)   . . yes
 N1        N2        1.239(6)   . . yes
 N3        N4        1.242(5)   . . yes
 C4        C5        1.406(7)   . . yes
 C4        C8        1.411(7)   . . yes
 C4        C9        1.507(7)   . . yes
 C5        C6        1.423(7)   . . yes
 C5        C10       1.499(8)   . . yes
 C6        C7        1.430(7)   . . yes
 C6        C11       1.493(7)   . . yes
 C7        C8        1.414(7)   . . yes
 C7        C12       1.509(7)   . . yes
 C8        C13       1.495(8)   . . yes
 C14       C15       1.532(7)   . . yes
 C16       C17       1.528(8)   . . yes
 C18       C19       1.520(8)   . . yes
 C20       C21       1.516(8)   . . yes
 C22       C23       1.521(7)   . . yes
 C24       C25       1.528(8)   . . yes
 C26       C27       1.515(8)   . . yes
 C28       C29       1.520(8)   . . yes
 C30       C31       1.522(8)   . . yes
 C32       C33       1.526(7)   . . yes
 C37       C38       1.411(8)   . . yes
 C37       C41       1.431(8)   . . yes
 C37       C42       1.487(8)   . . yes
 C38       C39       1.403(8)   . . yes
 C38       C43       1.506(8)   . . yes
 C39       C40       1.416(8)   . . yes
 C39       C44       1.503(7)   . . yes
 C40       C41       1.419(8)   . . yes
 C40       C45       1.508(9)   . . yes
 C41       C46       1.484(8)   . . yes
 C47       C48       1.536(7)   . . yes
 C49       C50       1.510(8)   . . yes
 C51       C52       1.523(7)   . . yes
 C53       C54       1.532(7)   . . yes
 C55       C56       1.532(7)   . . yes
 C57       C58       1.526(7)   . . yes
 C59       C60       1.528(8)   . . yes
 C61       C62       1.524(9)   . . yes
 C63       C64       1.516(7)   . . yes
 C65       C66       1.514(7)   . . yes
#------------------------------------------------------------------------------
loop_
_geom_angle_atom_site_label_1
_geom_angle_atom_site_label_2
_geom_angle_atom_site_label_3
_geom_angle
_geom_angle_site_symmetry_1
_geom_angle_site_symmetry_2
_geom_angle_site_symmetry_3
_geom_angle_publ_flag
   P1        W1        P2        80.22(4)   . . . yes
   P1        W1        P3        171.78(4)  . . . yes
   P1        W1        P4        99.43(4)   . . . yes
   P1        W1        N1        95.3(1)    . . . yes
   P1        W1        C3        83.7(1)    . . . yes
   P2        W1        P3        100.48(4)  . . . yes
   P2        W1        P4        175.06(4)  . . . yes
   P2        W1        N1        93.9(1)    . . . yes
   P2        W1        C3        86.5(1)    . . . yes
   P3        W1        P4        79.16(4)   . . . yes
   P3        W1        N1        92.9(1)    . . . yes
   P3        W1        C3        88.2(1)    . . . yes
   P4        W1        N1        91.1(1)    . . . yes
   P4        W1        C3        88.6(1)    . . . yes
   N1        W1        C3        178.8(2)   . . . yes
   P5        W2        P6        79.63(4)   . . . yes
   P5        W2        P7        175.55(4)  . . . yes
   P5        W2        P8        100.93(4)  . . . yes
   P5        W2        N3        89.8(1)    . . . yes
   P5        W2        C36       87.6(1)    . . . yes
   P6        W2        P7        99.35(4)   . . . yes
   P6        W2        P8        169.69(4)  . . . yes
   P6        W2        N3        91.8(1)    . . . yes
   P6        W2        C36       85.0(1)    . . . yes
   P7        W2        P8        79.30(4)   . . . yes
   P7        W2        N3        94.6(1)    . . . yes
   P7        W2        C36       88.0(1)    . . . yes
   P8        W2        N3        98.5(1)    . . . yes
   P8        W2        C36       84.7(1)    . . . yes
   N3        W2        C36       176.2(2)   . . . yes
   N2        TI1       C1        99.5(2)    . . . yes
   N2        TI1       C2        100.9(2)   . . . yes
   N2        TI1       C4        156.2(2)   . . . yes
   N2        TI1       C5        125.4(2)   . . . yes
   N2        TI1       C6        99.7(2)    . . . yes
   N2        TI1       C7        105.5(2)   . . . yes
   N2        TI1       C8        137.2(2)   . . . yes
   C1        TI1       C2        98.7(2)    . . . yes
   C1        TI1       C4        100.2(2)   . . . yes
   C1        TI1       C5        133.7(2)   . . . yes
   C1        TI1       C6        138.3(2)   . . . yes
   C1        TI1       C7        103.9(2)   . . . yes
   C1        TI1       C8        84.1(2)    . . . yes
   C2        TI1       C4        89.2(2)    . . . yes
   C2        TI1       C5        84.8(2)    . . . yes
   C2        TI1       C6        113.4(2)   . . . yes
   C2        TI1       C7        141.5(2)   . . . yes
   C2        TI1       C8        120.9(2)   . . . yes
   C4        TI1       C5        33.5(2)    . . . yes
   C4        TI1       C6        56.5(2)    . . . yes
   C4        TI1       C7        56.5(2)    . . . yes
   C4        TI1       C8        33.6(2)    . . . yes
   C5        TI1       C6        34.3(2)    . . . yes
   C5        TI1       C7        57.1(2)    . . . yes
   C5        TI1       C8        56.2(2)    . . . yes
   C6        TI1       C7        35.0(2)    . . . yes
   C6        TI1       C8        57.2(2)    . . . yes
   C7        TI1       C8        34.3(2)    . . . yes
   N4        TI2       C34       98.4(2)    . . . yes
   N4        TI2       C35       99.9(2)    . . . yes
   N4        TI2       C37       158.9(2)   . . . yes
   N4        TI2       C38       130.7(2)   . . . yes
   N4        TI2       C39       103.1(2)   . . . yes
   N4        TI2       C40       104.3(2)   . . . yes
   N4        TI2       C41       133.5(2)   . . . yes
   C34       TI2       C35       99.1(2)    . . . yes
   C34       TI2       C37       95.8(2)    . . . yes
   C34       TI2       C38       129.3(2)   . . . yes
   C34       TI2       C39       138.3(2)   . . . yes
   C34       TI2       C40       105.4(2)   . . . yes
   C34       TI2       C41       82.2(2)    . . . yes
   C35       TI2       C37       93.1(2)    . . . yes
   C35       TI2       C38       85.5(2)    . . . yes
   C35       TI2       C39       111.6(2)   . . . yes
   C35       TI2       C40       142.3(2)   . . . yes
   C35       TI2       C41       126.1(2)   . . . yes
   C37       TI2       C38       33.6(2)    . . . yes
   C37       TI2       C39       56.4(2)    . . . yes
   C37       TI2       C40       56.7(2)    . . . yes
   C37       TI2       C41       34.1(2)    . . . yes
   C38       TI2       C39       34.0(2)    . . . yes
   C38       TI2       C40       56.8(2)    . . . yes
   C38       TI2       C41       56.5(2)    . . . yes
   C39       TI2       C40       34.6(2)    . . . yes
   C39       TI2       C41       57.1(2)    . . . yes
   C40       TI2       C41       34.4(2)    . . . yes
   W1        P1        C14       109.6(2)   . . . yes
   W1        P1        C16       121.2(2)   . . . yes
   W1        P1        C18       118.6(2)   . . . yes
   C14       P1        C16       102.1(2)   . . . yes
   C14       P1        C18       103.0(3)   . . . yes
   C16       P1        C18       99.8(3)    . . . yes
   W1        P2        C15       110.1(2)   . . . yes
   W1        P2        C20       122.6(2)   . . . yes
   W1        P2        C22       114.2(2)   . . . yes
   C15       P2        C20       99.8(2)    . . . yes
   C15       P2        C22       103.8(2)   . . . yes
   C20       P2        C22       104.0(2)   . . . yes
   W1        P3        C24       107.7(2)   . . . yes
   W1        P3        C26       122.9(2)   . . . yes
   W1        P3        C28       117.8(2)   . . . yes
   C24       P3        C26       102.6(3)   . . . yes
   C24       P3        C28       101.5(3)   . . . yes
   C26       P3        C28       101.4(2)   . . . yes
   W1        P4        C25       110.6(2)   . . . yes
   W1        P4        C30       116.0(2)   . . . yes
   W1        P4        C32       121.7(2)   . . . yes
   C25       P4        C30       100.2(3)   . . . yes
   C25       P4        C32       102.7(3)   . . . yes
   C30       P4        C32       102.8(2)   . . . yes
   W2        P5        C47       109.6(2)   . . . yes
   W2        P5        C49       120.2(2)   . . . yes
   W2        P5        C51       119.5(2)   . . . yes
   C47       P5        C49       98.2(2)    . . . yes
   C47       P5        C51       102.3(2)   . . . yes
   C49       P5        C51       103.7(2)   . . . yes
   W2        P6        C48       110.3(2)   . . . yes
   W2        P6        C53       114.8(2)   . . . yes
   W2        P6        C55       122.5(2)   . . . yes
   C48       P6        C53       100.8(2)   . . . yes
   C48       P6        C55       101.6(2)   . . . yes
   C53       P6        C55       104.1(2)   . . . yes
   W2        P7        C57       109.8(2)   . . . yes
   W2        P7        C59       109.4(2)   . . . yes
   W2        P7        C61       127.6(2)   . . . yes
   C57       P7        C59       104.4(3)   . . . yes
   C57       P7        C61       101.6(3)   . . . yes
   C59       P7        C61       101.7(3)   . . . yes
   W2        P8        C58       110.4(2)   . . . yes
   W2        P8        C63       122.7(2)   . . . yes
   W2        P8        C65       117.9(2)   . . . yes
   C58       P8        C63       99.2(2)    . . . yes
   C58       P8        C65       102.0(2)   . . . yes
   C63       P8        C65       101.4(2)   . . . yes
   W1        N1        N2        176.7(4)   . . . yes
   TI1       N2        N1        178.2(4)   . . . yes
   W2        N3        N4        174.6(4)   . . . yes
   TI2       N4        N3        173.8(3)   . . . yes
   TI1       C4        C5        72.5(3)    . . . yes
   TI1       C4        C8        72.3(3)    . . . yes
   TI1       C4        C9        122.7(3)   . . . yes
   C5        C4        C8        108.7(5)   . . . yes
   C5        C4        C9        124.7(5)   . . . yes
   C8        C4        C9        126.6(5)   . . . yes
   TI1       C5        C4        74.0(3)    . . . yes
   TI1       C5        C6        71.3(3)    . . . yes
   TI1       C5        C10       124.7(4)   . . . yes
   C4        C5        C6        108.3(4)   . . . yes
   C4        C5        C10       126.6(5)   . . . yes
   C6        C5        C10       124.8(5)   . . . yes
   TI1       C6        C5        74.4(3)    . . . yes
   TI1       C6        C7        71.4(3)    . . . yes
   TI1       C6        C11       123.6(3)   . . . yes
   C5        C6        C7        106.9(5)   . . . yes
   C5        C6        C11       125.9(5)   . . . yes
   C7        C6        C11       127.0(5)   . . . yes
   TI1       C7        C6        73.6(3)    . . . yes
   TI1       C7        C8        75.4(3)    . . . yes
   TI1       C7        C12       123.6(3)   . . . yes
   C6        C7        C8        108.4(4)   . . . yes
   C6        C7        C12       125.1(5)   . . . yes
   C8        C7        C12       126.0(5)   . . . yes
   TI1       C8        C4        74.1(3)    . . . yes
   TI1       C8        C7        70.3(3)    . . . yes
   TI1       C8        C13       125.5(4)   . . . yes
   C4        C8        C7        107.6(5)   . . . yes
   C4        C8        C13       126.9(5)   . . . yes
   C7        C8        C13       125.2(5)   . . . yes
   P1        C14       C15       110.2(4)   . . . yes
   P2        C15       C14       110.2(3)   . . . yes
   P1        C16       C17       115.3(4)   . . . yes
   P1        C18       C19       118.4(4)   . . . yes
   P2        C20       C21       114.1(4)   . . . yes
   P2        C22       C23       117.8(4)   . . . yes
   P3        C24       C25       108.7(4)   . . . yes
   P4        C25       C24       109.3(4)   . . . yes
   P3        C26       C27       114.5(4)   . . . yes
   P3        C28       C29       118.5(4)   . . . yes
   P4        C30       C31       114.5(4)   . . . yes
   P4        C32       C33       118.1(4)   . . . yes
   TI2       C37       C38       71.9(3)    . . . yes
   TI2       C37       C41       71.7(3)    . . . yes
   TI2       C37       C42       122.5(4)   . . . yes
   C38       C37       C41       107.8(5)   . . . yes
   C38       C37       C42       126.0(6)   . . . yes
   C41       C37       C42       126.3(6)   . . . yes
   TI2       C38       C37       74.5(3)    . . . yes
   TI2       C38       C39       71.3(3)    . . . yes
   TI2       C38       C43       124.1(4)   . . . yes
   C37       C38       C39       108.6(5)   . . . yes
   C37       C38       C43       125.1(6)   . . . yes
   C39       C38       C43       126.1(5)   . . . yes
   TI2       C39       C38       74.7(3)    . . . yes
   TI2       C39       C40       72.6(3)    . . . yes
   TI2       C39       C44       123.8(3)   . . . yes
   C38       C39       C40       108.3(5)   . . . yes
   C38       C39       C44       126.3(5)   . . . yes
   C40       C39       C44       125.1(6)   . . . yes
   TI2       C40       C39       72.7(3)    . . . yes
   TI2       C40       C41       74.6(3)    . . . yes
   TI2       C40       C45       119.5(4)   . . . yes
   C39       C40       C41       108.0(5)   . . . yes
   C39       C40       C45       128.0(6)   . . . yes
   C41       C40       C45       124.0(6)   . . . yes
   TI2       C41       C37       74.2(3)    . . . yes
   TI2       C41       C40       71.0(3)    . . . yes
   TI2       C41       C46       125.4(4)   . . . yes
   C37       C41       C40       107.4(5)   . . . yes
   C37       C41       C46       127.4(6)   . . . yes
   C40       C41       C46       124.9(6)   . . . yes
   P5        C47       C48       111.2(4)   . . . yes
   P6        C48       C47       108.3(3)   . . . yes
   P5        C49       C50       115.9(4)   . . . yes
   P5        C51       C52       117.3(4)   . . . yes
   P6        C53       C54       113.8(4)   . . . yes
   P6        C55       C56       116.9(4)   . . . yes
   P7        C57       C58       109.4(4)   . . . yes
   P8        C58       C57       111.9(4)   . . . yes
   P7        C59       C60       118.9(4)   . . . yes
   P7        C61       C62       115.3(4)   . . . yes
   P8        C63       C64       114.2(4)   . . . yes
   P8        C65       C66       117.9(4)   . . . yes
#------------------------------------------------------------------------------
loop_
_geom_contact_atom_site_label_1
_geom_contact_atom_site_label_2
_geom_contact_distance
_geom_contact_site_symmetry_1
_geom_contact_site_symmetry_2
_geom_contact_publ_flag
#------------------------------------------------------------------------------
#------------------------------------------------------------------------------
